# Supplementary material for: Immunoassay for serodiagnosis of Zika virus infection based on time-resolved Förster resonance energy transfer
Source: PLoS One. 2019 Jul 23;14(7):e0219474. doi: 10.1371/journal.pone.0219474 (PMC6650140; doi:10.1371/journal.pone.0219474)
Supplement: S1 Table — This table contains the LFRET test results for all samples in all of the assay variants. (XLSX) [file pone.0219474.s001.xlsx]

## Sheet: Table 1
ZIKV+ samples
N:o	Sample ID	Class-independent LFRET	Test outcome		Acute-LFRET	Test outcome		Immunity-LFRET	Test outcome
1	031	72.6548	1		84.1844	1		38.7278	0
2	188	88.4636	1		119.215	1		75.6522	1
3	229	100.06	1		114.518	1		66.4941	1
4	354	116.169	1		205.639	1		71.9797	1
5	595	85.4356	1		83.3632	1		107.332	1
6	775	34.1681	0		66.0199	1		34.3508	0
7	864	28.7384	0		64.6894	1		38.2113	0
8	901	70.4006	1		151.704	1		48.7299	0
9	948	57.801	1		106.793	1		72.3697	1
10	956	57.9399	1		85.787	1		66.4407	1
11	z1-1	220.427	1		117.899	1		79.6742	1
12	z1-2	192.733	1		102.19	1		301.736	1
13	z1-6	122.326	1		149.731	1		175.018	1
14	z1-8	82.3646	1		77.96	1		148.65	1
15	z2-1	136.975	1		63.7392	1		293.138	1
16	z2-3	74.0641	1		62.5877	1		108.799	1
17	z3-1	67.9813	1		63.2271	1		128.233	1
18	z3-3	69.1676	1		44.1586	0		127.263	1
19	z4-1	96.7599	1		139.248	1		92.2169	1
20	z4-3	144.147	1		101.794	1		197.608	1
21	z4-4	89.4557	1		68.7632	1		166.256	1
22	z5-1	105.118	1		245.1	1		57.3122	0
23	z5-4	117.257	1		80.6951	1		137.029	1
24	z6-1	176.467	1		237.978	1		185.545	1
25	z7-1	171.054	1		169.019	1		117.564	1
DENV+ samples
N:o	Sample ID	Class-independent LFRET	Test outcome		Acute-LFRET	Test outcome		Immunity-LFRET	Test outcome
1	15DE374	39.0261	0		14.9633	0		27.159	0
2	15DE409	38.3258	0		25.771	0		57.0482	0
3	14DE635	38.8702	0		30.0777	0		53.7453	0
4	14DE582	37.8563	0		16.6459	0		30.8381	0
5	13DE998	48.4256	0		18.9055	0		55.3737	0
6	13DE678	52.0397	0		24.0578	0		41.1584	0
7	13DE641	49.1741	0		44.2469	0		25.3729	0
8	13DE629	53.6721	0		32.2389	0		53.1034	0
9	13DE478	36.2222	0		14.418	0		37.2182	0
10	13DE525	47.175	0		39.8319	0		45.8809	0
11	15DE387	62.5085	1		80.4722	1		55.6416	0
12	14DE393	30.3007	0		23.9213	0		depleted	N/A
13	14DE428	68.4563	1		depleted	N/A		depleted	N/A
14	14DE442	53.1709	0		34.4869	0		34.7752	0
15	14DE381	44.4753	0		29.3849	0		56.0117	0
16	13DE346	29.1143	0		20.4317	0		47.4032	0
17	13DE270	40.6297	0		16.1348	0		51.9467	0
18	13DE264	29.0594	0		19.442	0		35.7387	0
19	13DE255	37.871	0		9.62706	0		36.5225	0
20	13DE208	65.1896	1		27.0017	0		48.0266	0
21	13DE112	26.8913	0		20.9798	0		39.956	0
22	12DE863	54.473	0		13.2043	0		59.3294	0
23	12DE841	48.3282	0		11.0708	0		32.24	0
24	12DE834	35.3332	0		29.178	0		31.0912	0
25	12DE772	25.0496	0		32.4447	0		28.1517	0
26	12DE741	44.002	0		34.2699	0		47.4939	0
27	12DE722	58.3103	1		69.4805	1		38.9706	0
28	12DE702	28.8236	0		26.9852	0		51.0051	0
29	12DE696	34.9636	0		36.4678	0		43.3365	0
30	12DE685	44.3687	0		31.1609	0		41.9267	0
31	09DE475	56.9004	0		28.9966	0		depleted	N/A
32	07DE287	30.0382	0		28.803	0		47.7302	0
33	07DE146	28.1386	0		33.7363	0		32.3575	0
34	06DE223	24.6891	0		35.2241	0		53.5915	0
35	06DE206	40.9896	0		35.9833	0		45.3429	0
36	12DE413	57.7742	1		29.1192	0		48.0266	0
37	11DE542	41.8983	0		25.4153	0		36.1281	0
38	10DE455	38.2626	0		32.6783	0		46.5852	0
YFV+ samples
N:o	Sample ID	Class-independent LFRET	Test outcome		Acute-LFRET	Test outcome		Immunity-LFRET	Test outcome
1	TH	74.7237	1		34.5638	0		30.488	0
2	TJ	40.3338	0		27.1699	0		50.4504	0
3	HV	28.1856	0		33.0126	0		36.9818	0
4	LK	43.9126	0		31.7445	0		27.1875	0
5	TM	29.2644	0		34.6053	0		30.7607	0
6	05UU2335	37.4144	0		31.9416	0		34.2432	0
7	AE	30.0833	0		22.4915	0		39.006	0
8	MS	34.3541	0		23.645	0		42.7797	0
9	JB	45.6039	0		36.0203	0		48.2893	0
10	MR	23.9729	0		48.1289	0		38.4087	0
11	HM	56.7197	0		39.1397	0		37.7535	0
12	JPM	68.8774	1		44.8297	0		52.3158	0
13	AuE	41.2555	0		49.3208	0		27.8445	0
14	TMa	26.6267	0		26.4244	0		27.5507	0
15	NH	24.1094	0		25.0483	0		37.2342	0
16	ME	38.5068	0		43.3977	0		43.8001	0
TBEV+ samples
N:o	Sample ID	Class-independent LFRET	Test outcome		Acute-LFRET	Test outcome		Immunity-LFRET	Test outcome
1	15TB755	33.3404	0		21.5204	0		depleted	N/A
2	15MY5192	23.7999	0		36.0072	0		depleted	N/A
3	15NE769	21.6171	0		23.2671	0		depleted	N/A
4	02TB660	34.2077	0		26.8869	0		depleted	N/A
5	00TB103	38.5762	0		19.2644	0		depleted	N/A
6	02TB668	24.5253	0		30.0372	0		depleted	N/A
7	00TB39	25.2759	0		24.1688	0		36.7207	0
8	00TB177	36.8038	0		31.2309	0		48.4677	0
9	OV_1	55.1789	0		48.6349	0		37.1926	0
10	OV_2	44.2214	0		21.8656	0		39.0171	0
11	OV_3	31.6431	0		32.8956	0		44.4472	0
12	OV_4	50.352	0		38.3064	0		35.1474	0
13	OV_5	50.9819	0		37.2811	0		50.6731	0
14	OV_6	33.5564	0		31.9847	0		45.5414	0
15	OV_7	28.9547	0		38.8173	0		42.0461	0
16	OV_8	53.3303	0		28.4503	0		39.7251	0
17	OV_9	38.7309	0		33.6998	0		31.0696	0
18	OV_10	34.4067	0		25.602	0		40.2612	0
19	OV_11	37.5103	0		41.9672	0		50.6469	0
20	OV_12	28.2033	0		28.1344	0		47.351	0
Negative samples
N:o	Sample ID	Class-independent LFRET	Test outcome		Acute-LFRET	Test outcome		Immunity-LFRET	Test outcome
1	NN_17	24.4591	0		34.5812	0		depleted	N/A
2	NN_18	20.325	0		21.7769	0		depleted	N/A
3	NN_27	26.4294	0		18.0429	0		depleted	N/A
4	NN_28	20.0708	0		34.0651	0		depleted	N/A
5	NN_29	28.653	0		22.4814	0		depleted	N/A
6	NN_30	11.3289	0		15.346	0		depleted	N/A
7	NN_31	12.8819	0		11.7733	0		depleted	N/A
8	NN_32	17.238	0		16.7312	0		depleted	N/A
9	NN_33	12.5402	0		17.9483	0		43.7496	0
10	NN_34	23.6388	0		21.9811	0		55.6331	0
11	NN_35	18.3347	0		32.0252	0		24.9185	0
12	TM	12.9307	0		24.3615	0		26.0656	0
13	LC	11.973	0		14.2025	0		42.9555	0
14	JV	10.6836	0		17.3889	0		40.5304	0
15	IS	12.3744	0		14.0772	0		41.4481	0
16	LK	14.3299	0		19.939	0		53.1151	0
17	JH	23.6071	0		20.2147	0		53.1705	0
18	AJ	6.78495	0		22.4617	0		44.445	0
19	TA	36.6545	0		30.7022	0		48.3095	0
20	P	27.619	0		12.5954	0		45.3203	0
21	VPS	2.69135	0		27.2791	0		31.7379	0
22	TS	7.22432	0		15.2221	0		29.2903	0
23	14DE328	55.578	0		35.9986	0		47.6499	0
24	14DE384	26.2278	0		20.3404	0		51.1836	0
25	14DE389	56.5533	0		48.6344	0		54.8262	0
26	14DE425	20.7117	0		40.2236	0		46.9438	0
